# Supplementary material
Source: PubMed Central journal article supplement (PMC8496133)

# Figure S1

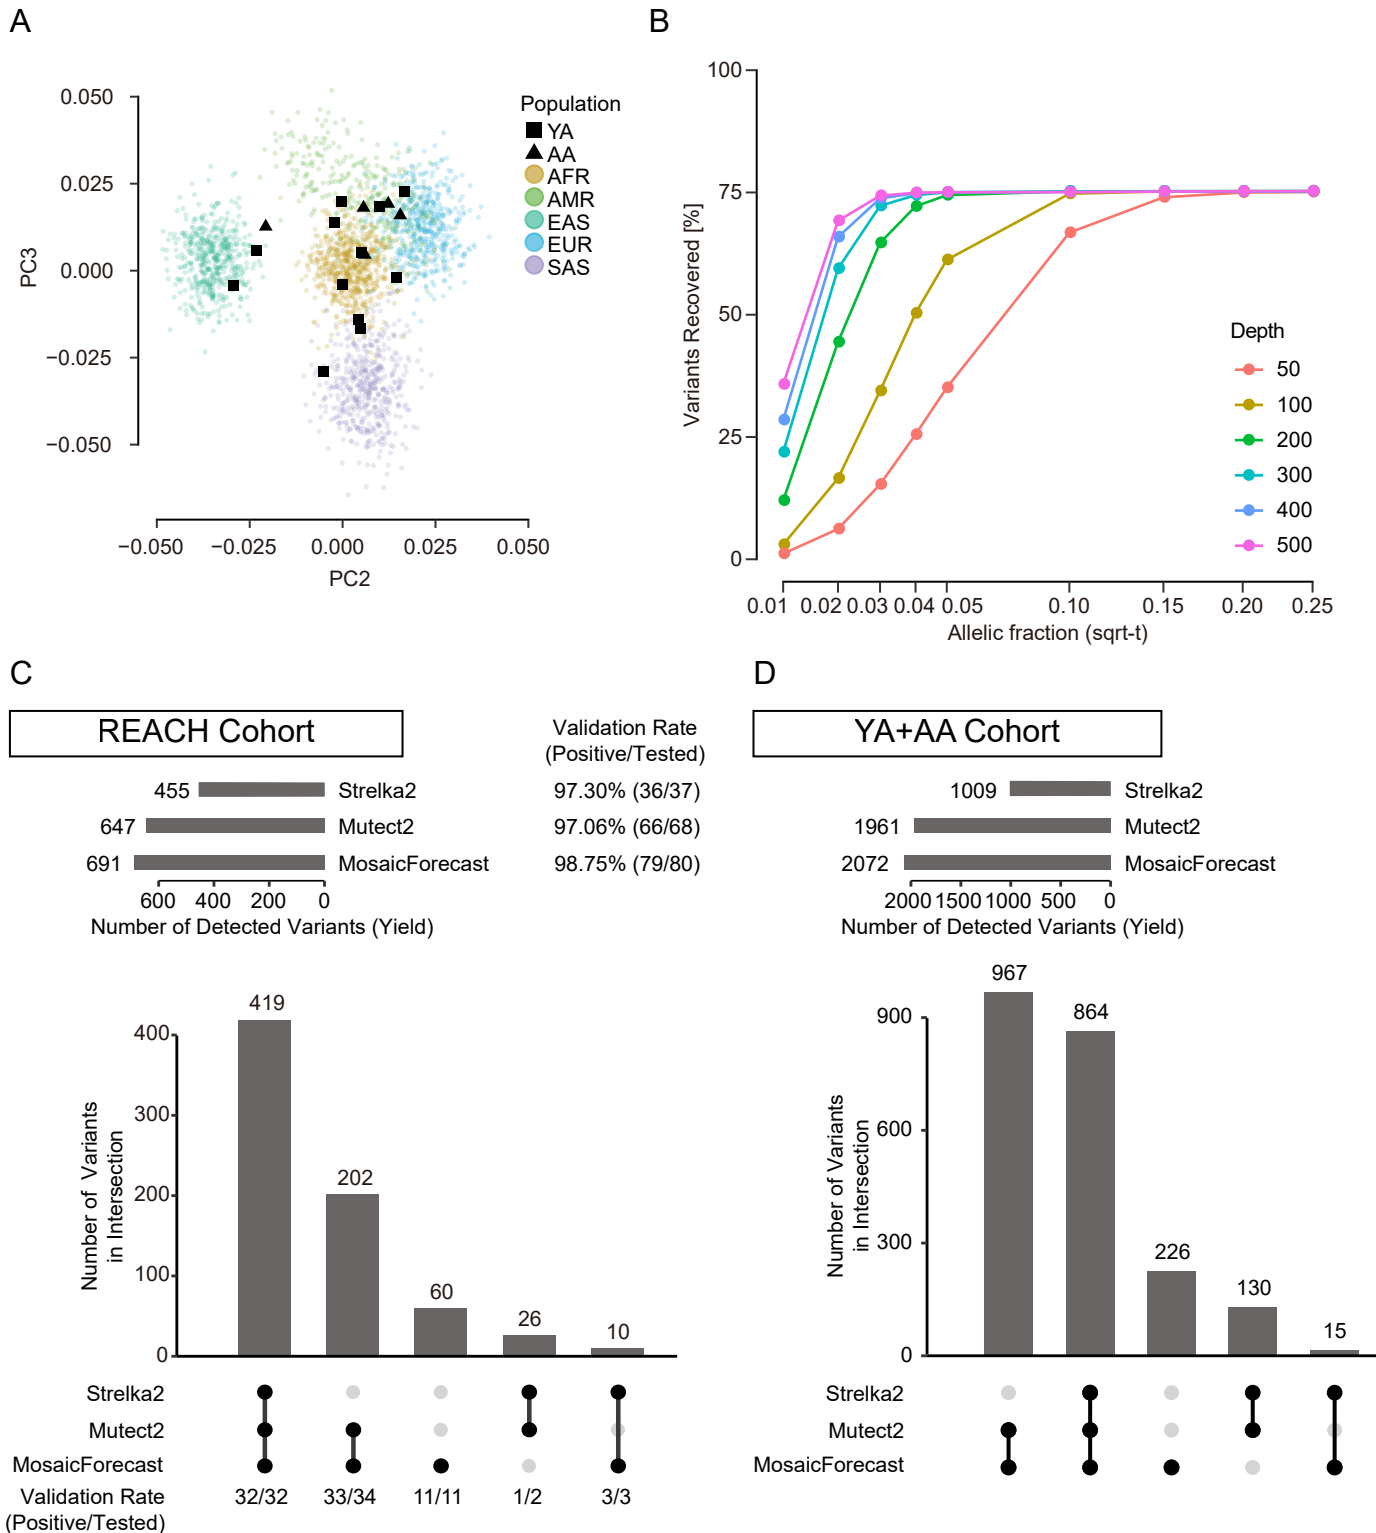

Supplement: NIHMS1731652-supplement-Figure_S1.pdf [file NIHMS1731652-supplement-Figure_S1.pdf]

Figure S2

YA Cohort

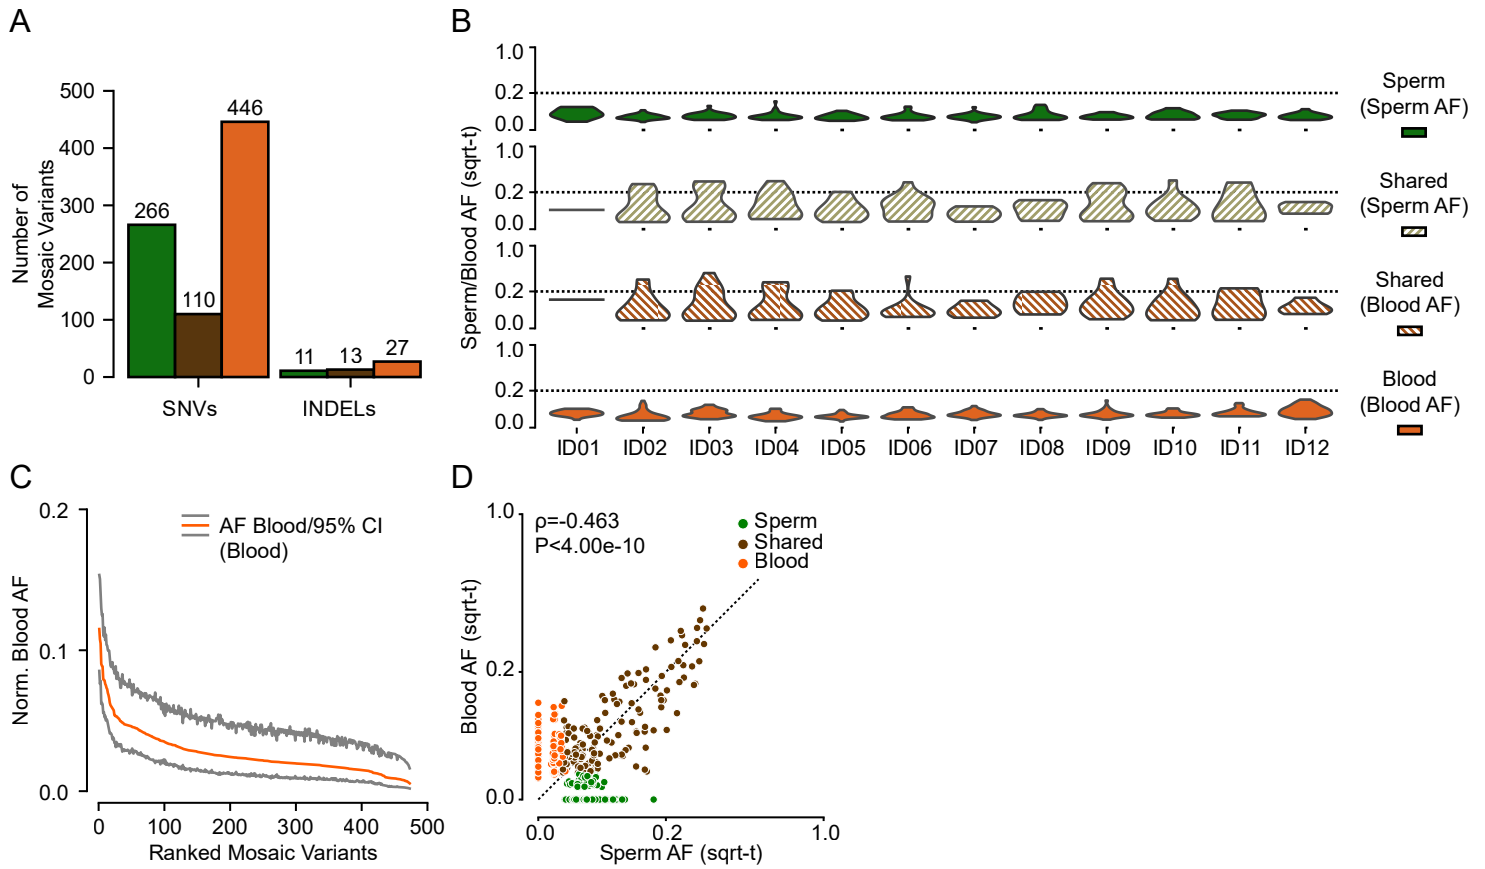

YA Cohort ( $t_1$ - $t_3$ )

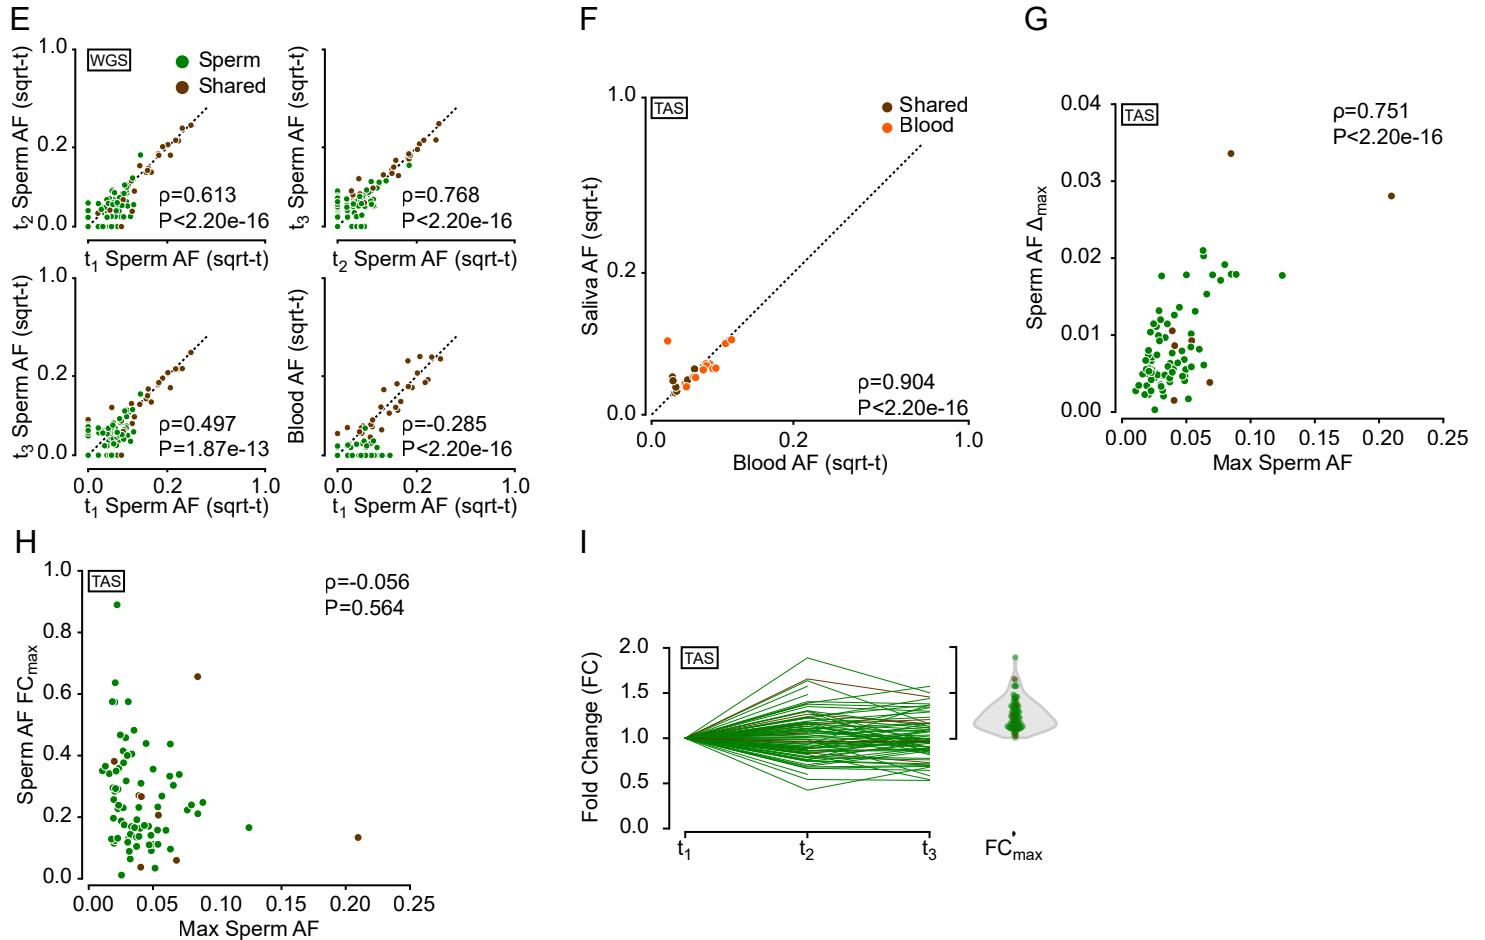

Supplement: NIHMS1731652-supplement-Figure_S2.pdf [file NIHMS1731652-supplement-Figure_S2.pdf]

# Figure S5

## REACH Cohort

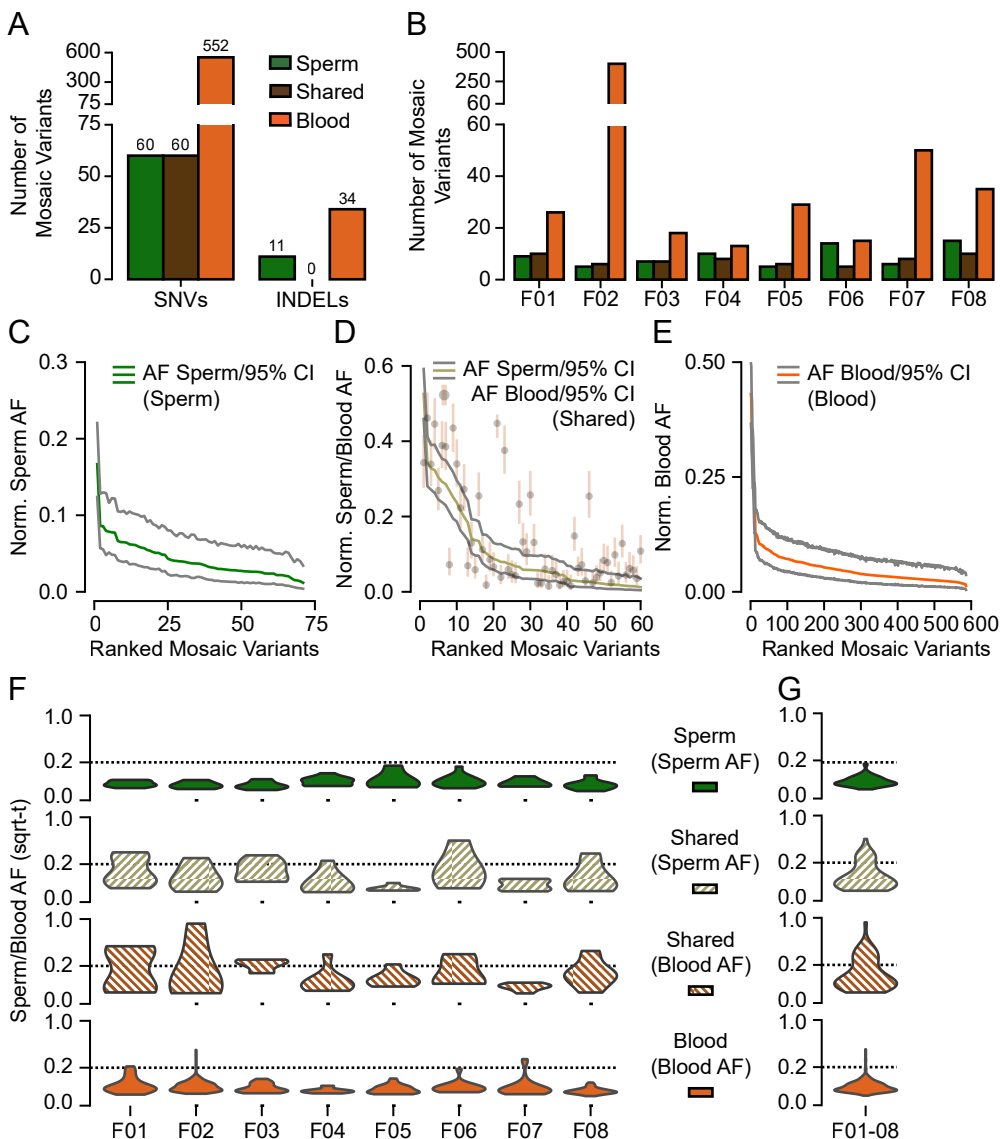

## YA/AA/REACH Cohort

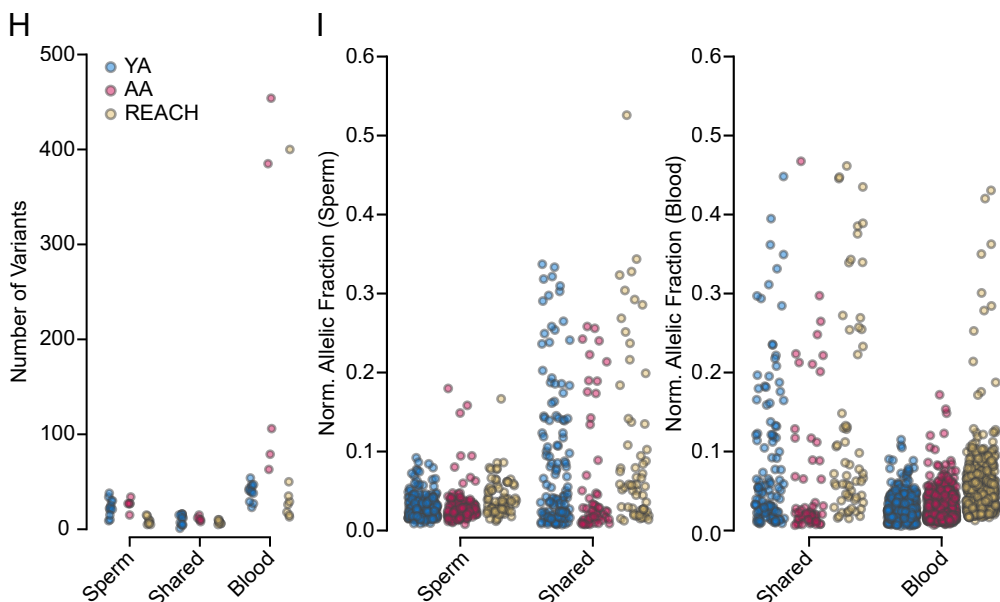

Supplement: NIHMS1731652-supplement-Figure_S4.pdf [file NIHMS1731652-supplement-Figure_S4.pdf]

# Figure S6

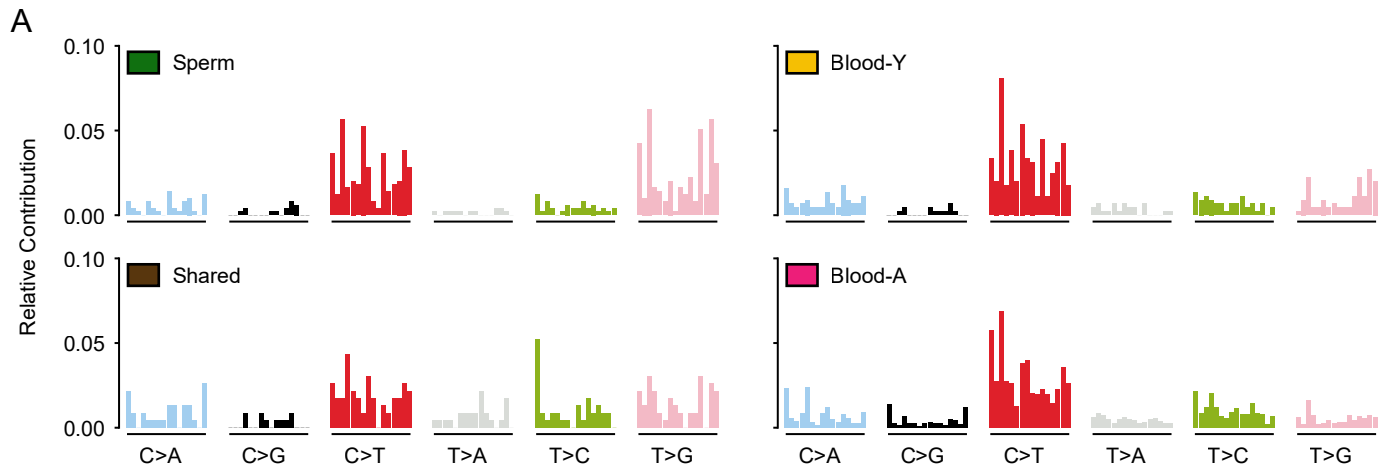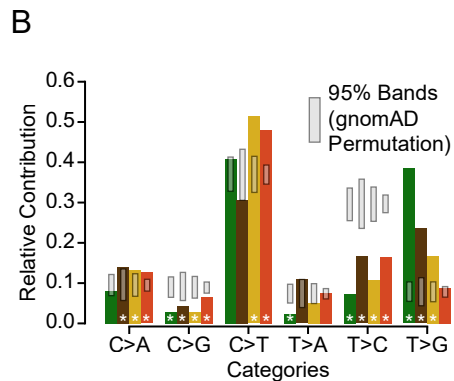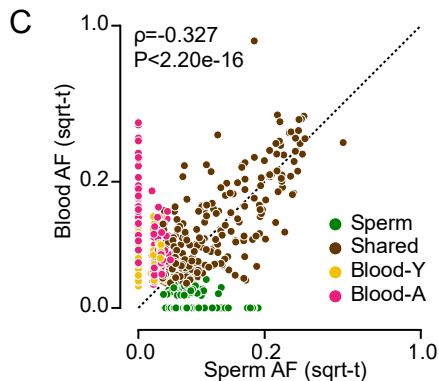

Supplement: NIHMS1731652-supplement-Figure_S5.pdf [file NIHMS1731652-supplement-Figure_S5.pdf]

# Figure S7

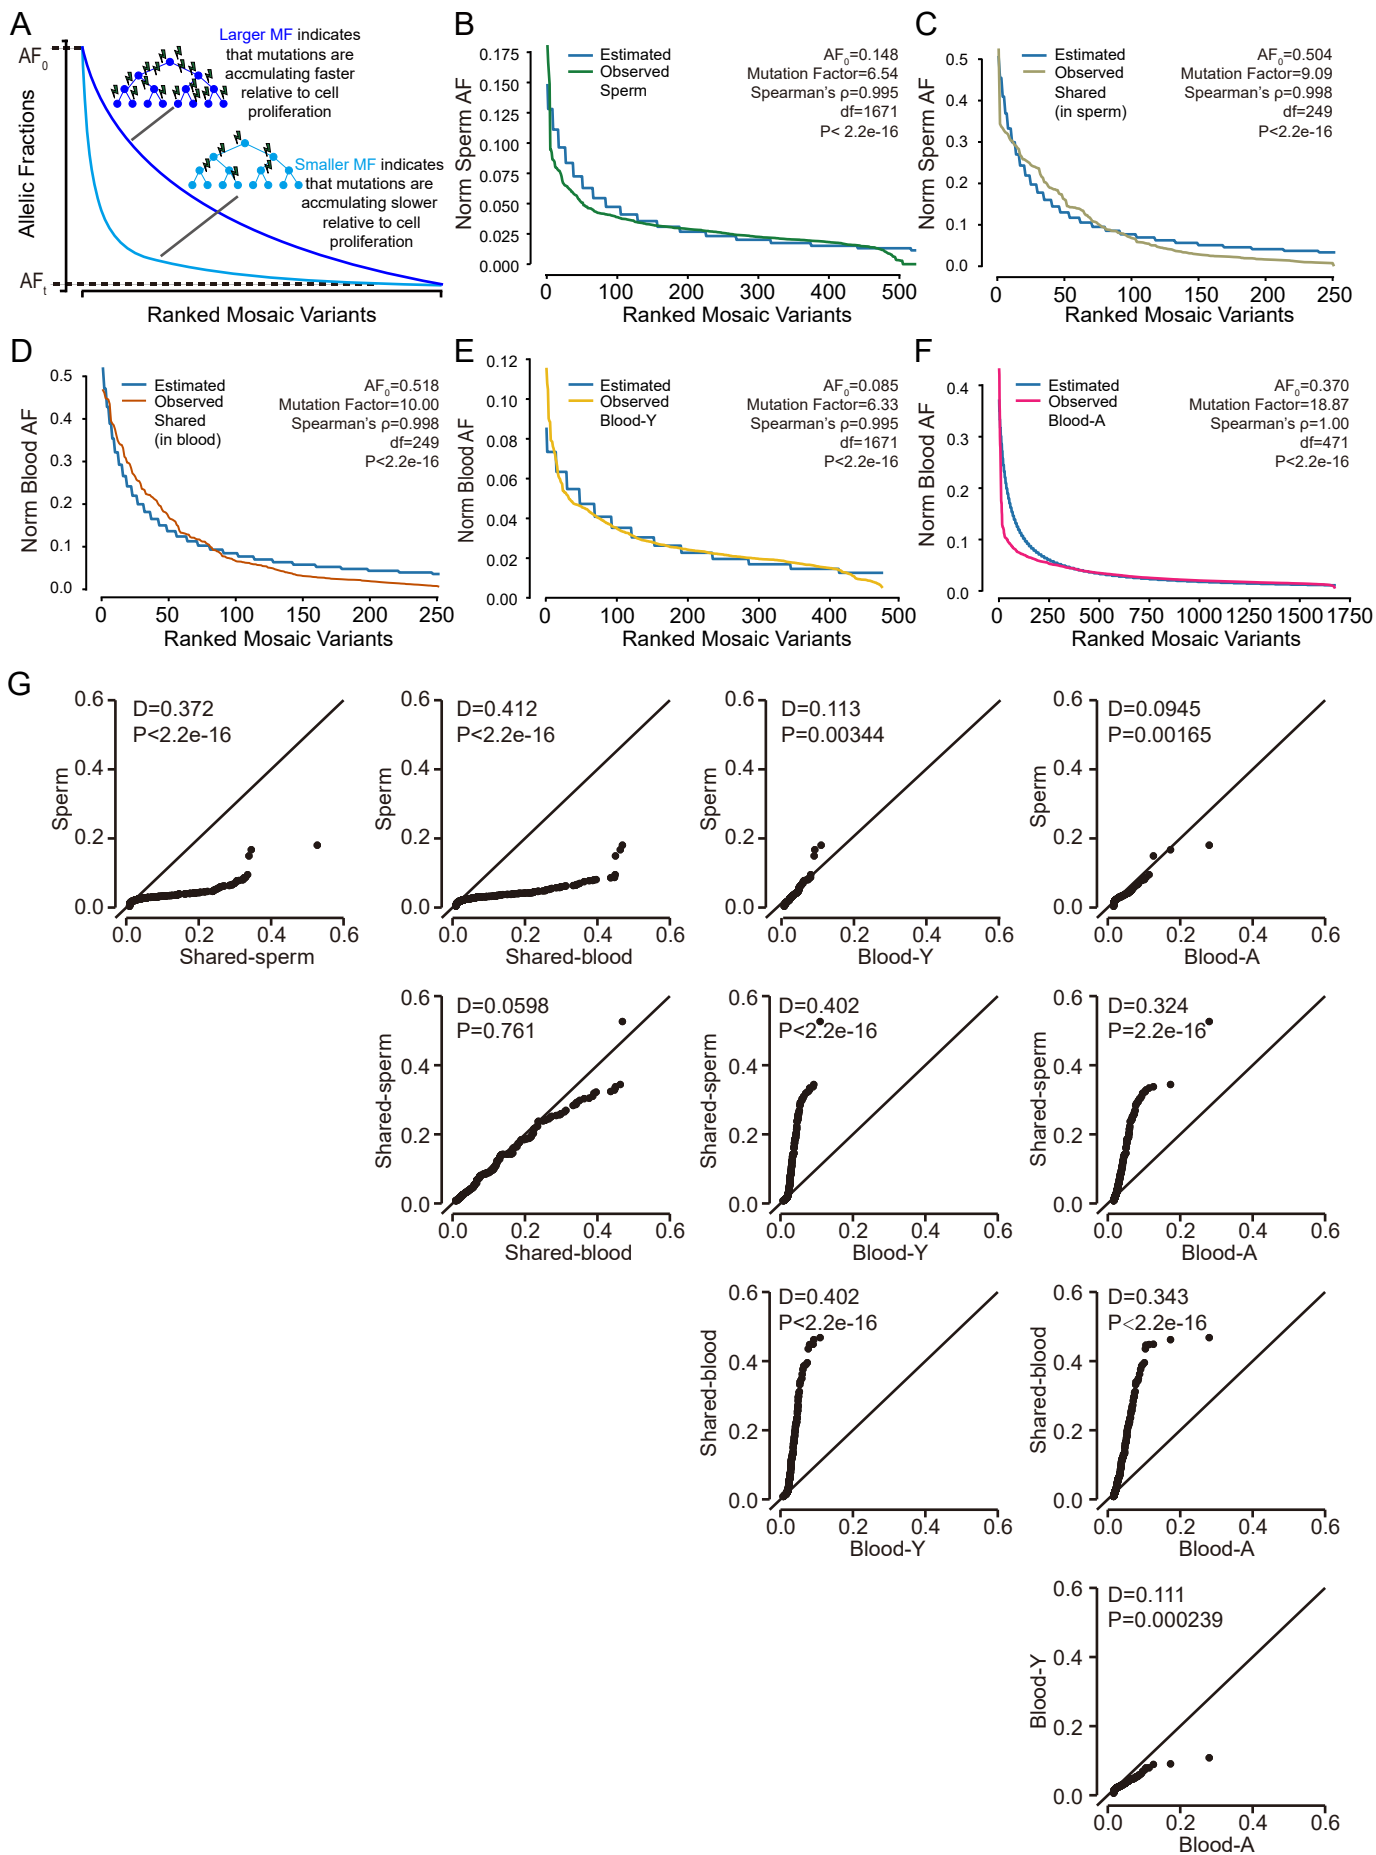

Supplement: NIHMS1731652-supplement-Figure_S6.pdf [file NIHMS1731652-supplement-Figure_S6.pdf]
